# Supplementary material
Source: PubMed Central journal article supplement (PMC4881354)
Supplement: rsbl20160087supp1.pdf [file rsbl20160087supp1.pdf]

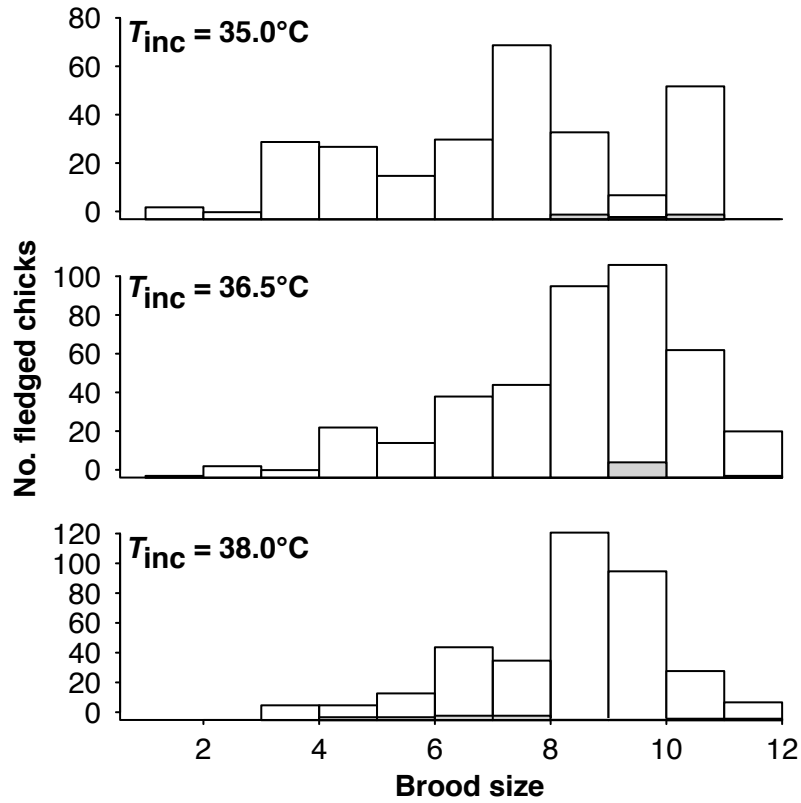

**Fig. S1. Frequency distribution of the number fledged birds in relation to brood size for each incubation temperature treatment.** The overlaying grey bars show the number of recruits that were observed in the breeding population in the year after manipulation, or later. Note that the y-axis scales differ between panels, whereas the x-axis scales do not.
