# Supplementary material
Source: PubMed Central journal article supplement (PMC4881354)
Supplement: rsbl20160087supp2.pdf [file rsbl20160087supp2.pdf]

**Table S1. Overview of numbers of fledged and recaptured birds.** The table shows the number of chicks from each incubation temperature treatment, for each year and in total, for which at least one individual survived to the next winter or longer, or survived and recruited into the local breeding population in the subsequent year or later. Numbers within brackets are the number of broods from which chicks survived or recruited. *N*-values denote the number of fledged chicks, with the number of broods within brackets.

|       | Winter  |         |         | Breeding |         |         | <i>N</i> |          |          |
|-------|---------|---------|---------|----------|---------|---------|----------|----------|----------|
|       | 35.0 °C | 36.5 °C | 38.0 °C | 35.0 °C  | 36.5 °C | 38.0 °C | 35.0 °C  | 36.5 °C  | 38.0 °C  |
| 2008  | 1 (1)   | 0 (0)   | 1 (1)   | 1 (1)    | 0 (0)   | 1 (1)   | 85 (15)  | 123 (16) | 150 (19) |
| 2009  | 5 (5)   | 8 (7)   | 6 (6)   | 4 (4)    | 8 (7)   | 6 (6)   | 126 (15) | 119 (14) | 75 (12)  |
| 2010  | -       | -       | -       | 0 (0)    | 1 (1)   | 1 (1)   | 53 (10)  | 121 (15) | 113 (14) |
| Total | 6 (6)   | 8 (7)   | 7 (7)   | 5 (5)    | 9 (8)   | 7 (7)   | 264 (40) | 363 (45) | 338 (45) |
